# Supplementary material
Source: Frontiers journal article supplement (https://www.frontiersin.org/articles/135324)
Supplement: Supplementary_Figure_S2.PDF [file Supplementary_Figure_S2.PDF]

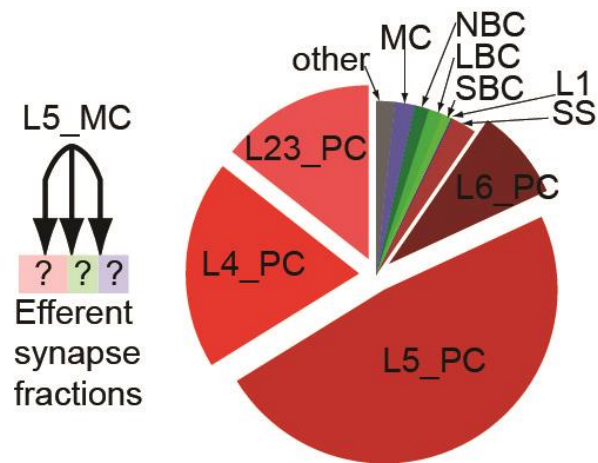

Figure S2: **Specificity of the L5\_MC to PC pathways**

Specificity of L5\_MC connectivity emerging from the pruning axonal appositions. The pie diagram depicts the fraction of efferent L5\_MC synapses on individual postsynaptic m-types.
