# Supplementary material
Source: Frontiers journal article supplement (https://www.frontiersin.org/articles/135324)
Supplement: Supplementary_Figure_S3.PDF [file Supplementary_Figure_S3.PDF]

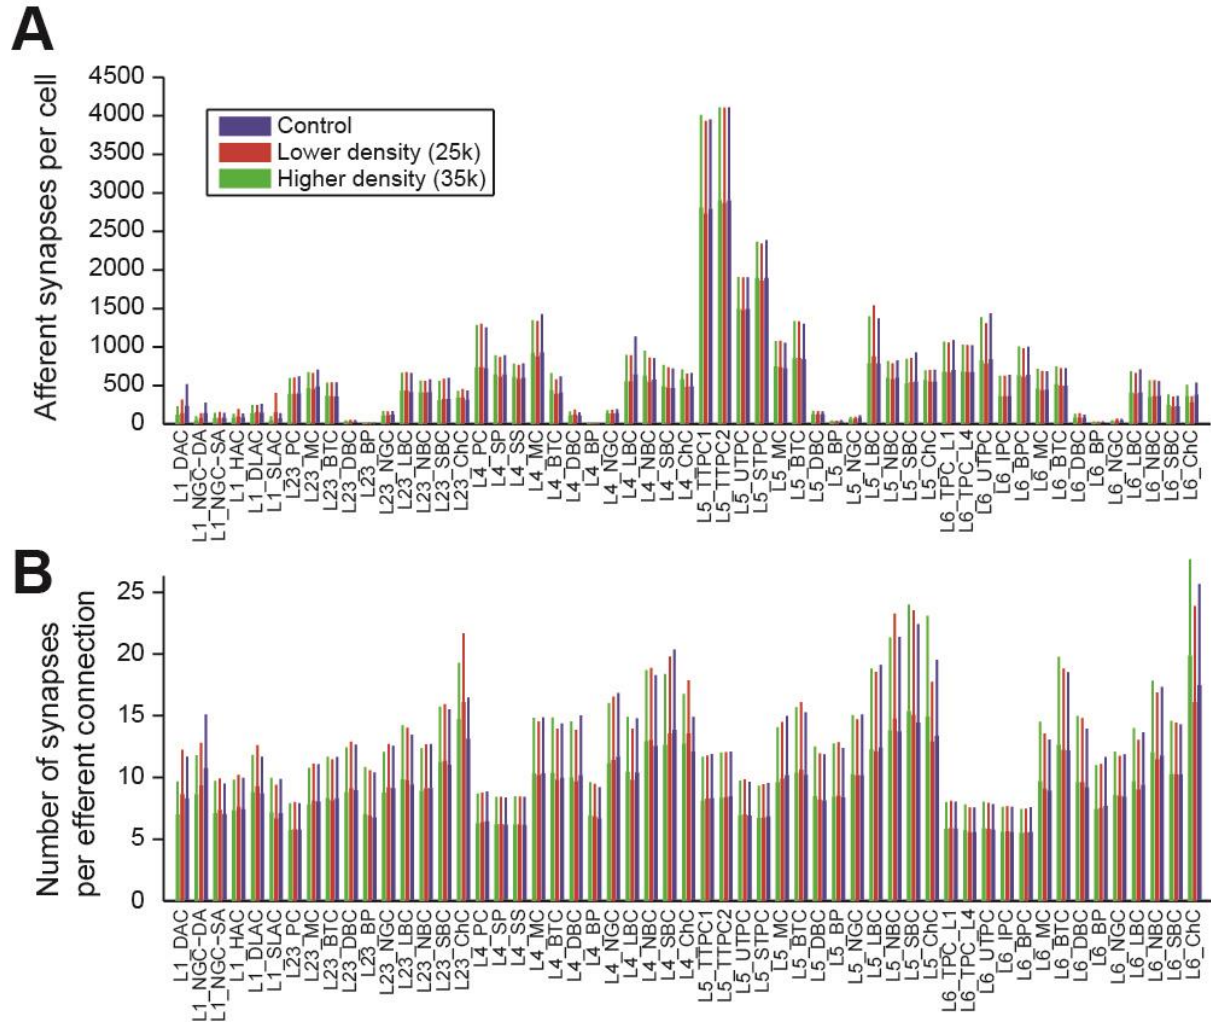

Figure S3: **Robustness of synapse counts against changes in cell density for individual pathways**

(A) Number of afferent synapses per neuron for all morphological neuron types. Bars indicate the mean, whiskers the standard deviation. Blue: 31,000 neurons in microcircuit (control); Red: 25,000 neurons in the same volume; green: 35,000 neurons in the same volume. (B) Same, for the number of synapses per efferent connection.
